# Supplementary material for: Energy-saving hydrogen production by water splitting coupling urea decomposition and oxidation reactions
Source: Royal Society of Chemistry journal article supplement (doi:10.1039/d2ta07152e), 2022-11-22
Supplement: d2ta07152e3.pdf [file d2ta07152e3.pdf]

## SUPPORTING INFORMATION

### **Energy-Saving Hydrogen Production by Water Splitting Coupling Urea Decomposition and Urea Oxidation Reaction**

Zehao Xiao,<sup>#a</sup> Yinyin Qian,<sup>#c,d,e</sup> Tianhui Tan,<sup>a</sup> Hongxiu Lu,<sup>a</sup> Canhui Liu,<sup>a</sup> Bowen Wang,<sup>a</sup> Qiang Zhang,<sup>d</sup> Muhammad Tariq Sarwar,<sup>c,d</sup> Ruijie Gao,<sup>\*c,d,e</sup> Aidong Tang,<sup>\*a,c,d,e</sup> Huaming Yang<sup>\*b,c,d,e</sup>

<sup>a</sup> College of Chemistry and Chemical Engineering, Central South University, Changsha 410083, China

<sup>b</sup> Hunan Key Lab of Mineral Materials and Application, School of Minerals Processing and Bioengineering, Central South University, Changsha 410083, China

<sup>c</sup> Engineering Research Center of Nano-Geomaterials of Ministry of Education, China University of Geosciences, Wuhan 430074, China

<sup>d</sup> Faculty of Materials Science and Chemistry, China University of Geosciences, Wuhan 430074, China

<sup>e</sup> Key Laboratory of Functional Geomaterials in China Nonmetallic Minerals Industry, China University of Geosciences, Wuhan 430074, China

## Chemicals

All chemicals used in this study were of analytical grade without further purification. KOH and urea were purchased from Sinopharm Chemical Reagent Co. Ltd.;  $\text{Ni}(\text{NO}_3)_2 \cdot 6\text{H}_2\text{O}$  was purchased from Macklin Ltd.;  $(\text{NH}_4)_6\text{Mo}_7\text{O}_{24} \cdot 2\text{H}_2\text{O}$  was purchased from Macklin Ltd.;  $\text{Na}_2\text{S} \cdot 9\text{H}_2\text{O}$  was purchased from Sinopharm Chemical Co. Ltd;  $\text{NH}_4\text{F}$  was purchased from Macklin Co. Ltd; Nickel foams (NF, areal density  $350 \text{ g} \cdot \text{cm}^{-2}$ , 1.5 mm thick) were purchased from Lvchuang Technology Co. Ltd.; hydrochloric acid (36.5%) was purchased from Chronchem Ltd. De-ionized (DI,  $18.2 \text{ } \Omega \cdot \text{cm}^{-1}$ ) water was standard solution.

## Synthesis of 20 wt% Pt/C/NF

10 mg commercial 20 wt% Pt/C powders, 500  $\mu\text{L}$  ethanol, 460  $\mu\text{L}$  water and 40  $\mu\text{L}$  Nafion were uniformly dispersed in the mixture solution with ultrasonication for 1 h. Next, above dispersive solution was slowly dropped into the cleaning NF and dried in air to prepare the 20 wt% Pt/C/NF catalyst.

## Synthesis of $\text{MoNi}_4/\text{MoO}_{3-x}$ catalyst

A piece of cleaning NF was firstly immersed into the solution of 1.2 mmol  $\text{Ni}(\text{NO}_3)_2 \cdot 6\text{H}_2\text{O}$ , 0.3 mmol  $(\text{NH}_4)_6\text{Mo}_7\text{O}_{24} \cdot 4\text{H}_2\text{O}$  and 30 ml of DI water with stirring for 20 mins in a Teflon autoclave. The above mixed solution was then kept at  $150 \text{ }^\circ\text{C}$  for 6 h. After the temperature reduced to room temperature, yellow  $\text{NiMoO}_4$  precursor was washed for several times and dried in air at  $60 \text{ }^\circ\text{C}$  overnight. Subsequently, the as-prepared  $\text{NiMoO}_4$  precursor was placed in a tube furnace under  $\text{H}_2/\text{Ar}$  (v/v, 10/90, 100 sccm) atmosphere. The furnace was kept at  $400 \text{ }^\circ\text{C}$  for 2 h under the heating rate of  $5 \text{ }^\circ\text{C} \cdot \text{min}^{-1}$ . After the temperature reduced to room temperature, black  $\text{MoNi}_4/\text{MoO}_{3-x}$  catalyst was obtained.

## DFT calculations

All theoretical calculations were carried out by the Dmol<sup>3</sup> software based on density functional theory (DFT). Specifically, exchange-correlation interactions were calculated by the generalized gradient approximation (GGA) with the Perdew-Burke-Ernzerhof (PBE).<sup>[1]</sup> Double numerical basis sets including polarization functions on all atoms were employed and the real-space global orbital cut-off radius was set as 4.5 Å. To avoid artificial interactions between the film and the periodic images, a vacuum space with a thickness of 25 Å was used. The weak interaction of van der Waals taken into account by using the DFT-D2 method. A  $6 \times 6 \times 1$  Monkhorst-Pack k-point sampling and the further increase in k-points had no significantly effect on the results.<sup>[2]</sup> The structure optimization reached convergence until maximum force convergence threshold of  $2 \times 10^{-3}$  hartree·Å<sup>-1</sup>, energy differences were converged within  $1.0 \times 10^{-5}$  hartree·Å<sup>-1</sup>, and maximum atomic displacement within  $5 \times 10^{-3}$  Å.

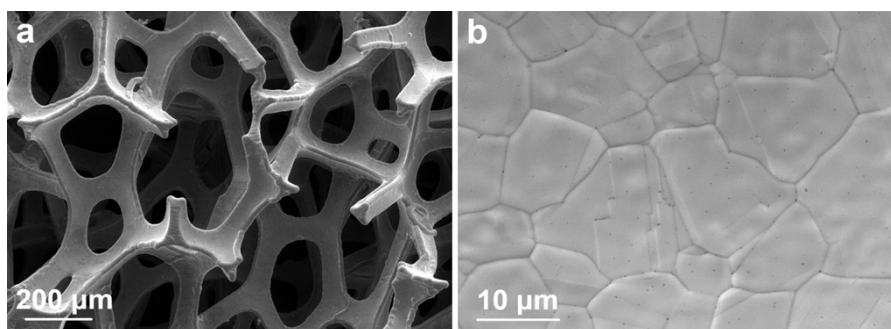

**Figure S1.** SEM images of the bare NF.

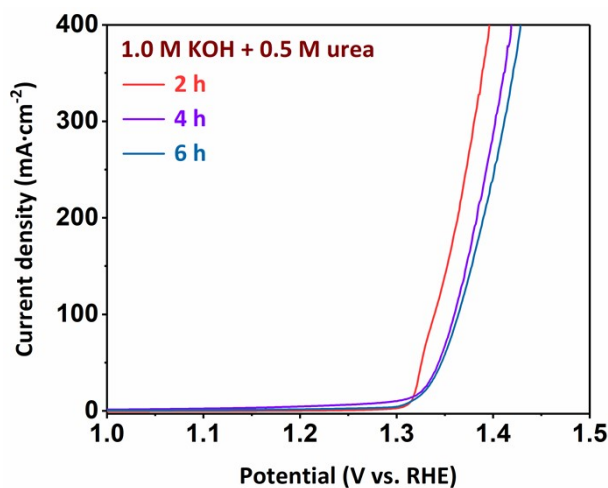

**Figure S2.** LSV curves of the  $\text{Ni}_3\text{S}_2$  catalyst synthesized under different sulfurization times in 1.0 M KOH with 0.5 M urea.

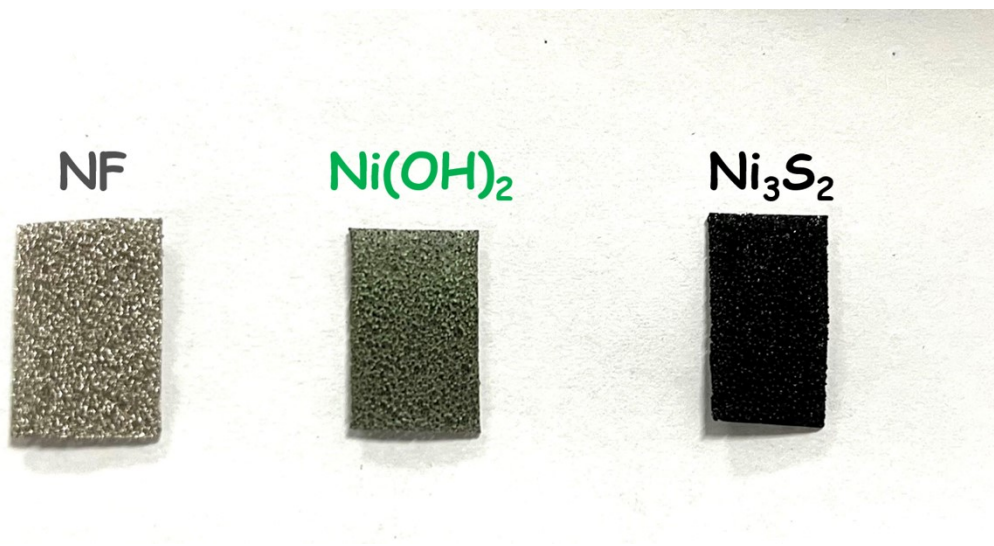

**Figure S3.** Digital images of NF,  $\text{Ni}(\text{OH})_2$  and  $\text{Ni}_3\text{S}_2$ .

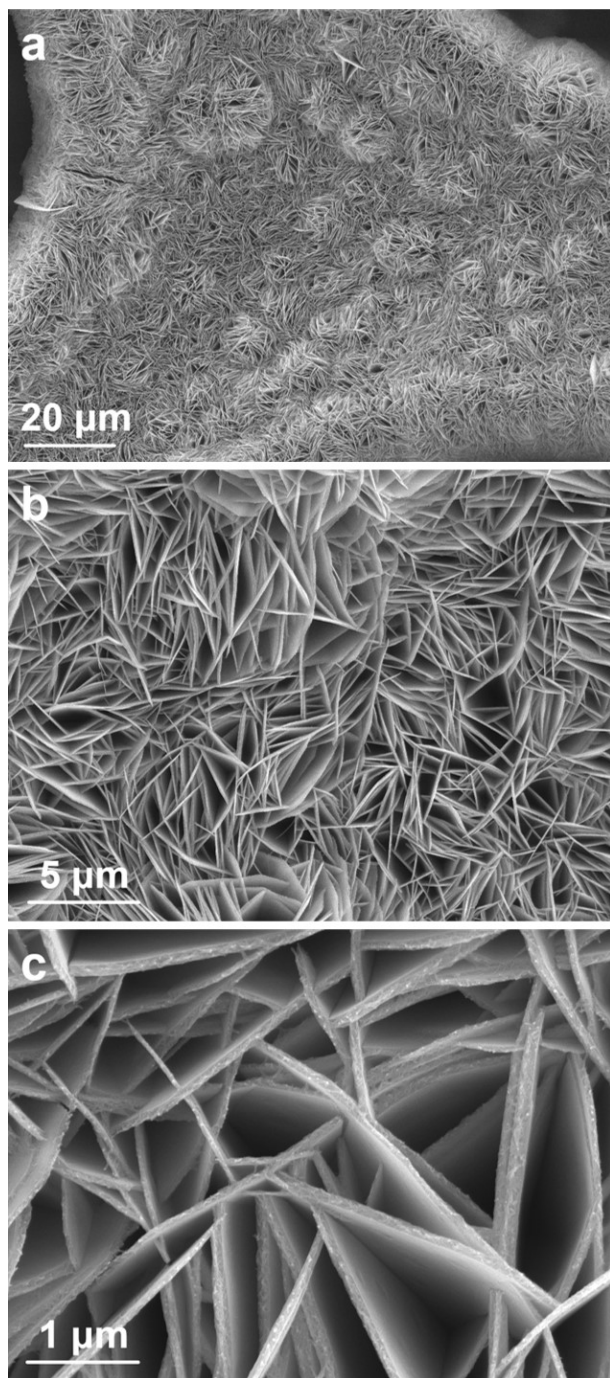

**Figure S4.** SEM images of the Ni(OH)<sub>2</sub> precursor.

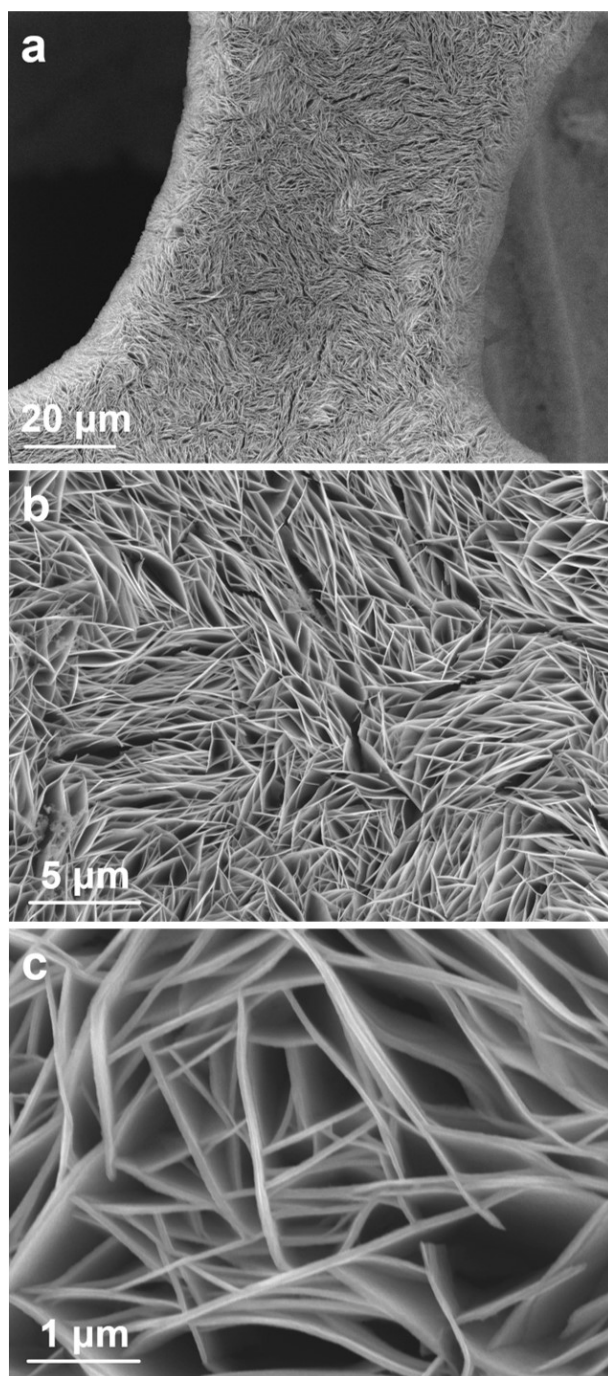

**Figure S5.** SEM images of the  $\text{Ni}_3\text{S}_2$  catalyst.

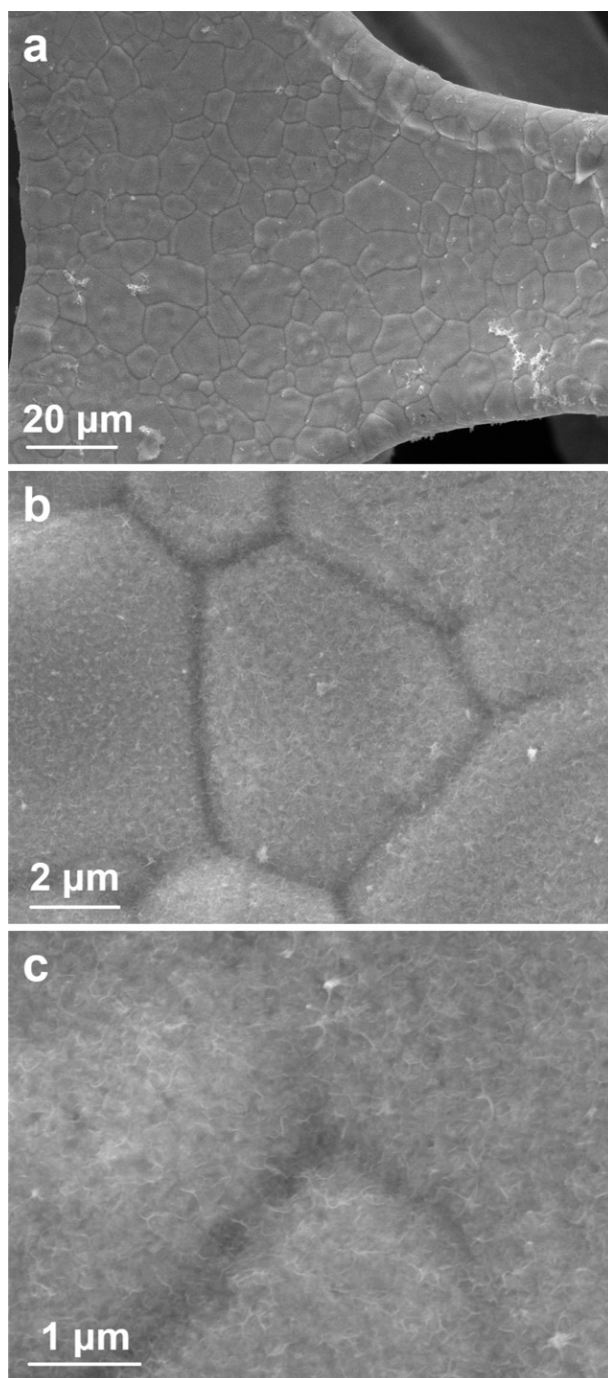

**Figure S6.** SEM images of the sample by direct sulfurization from NF.

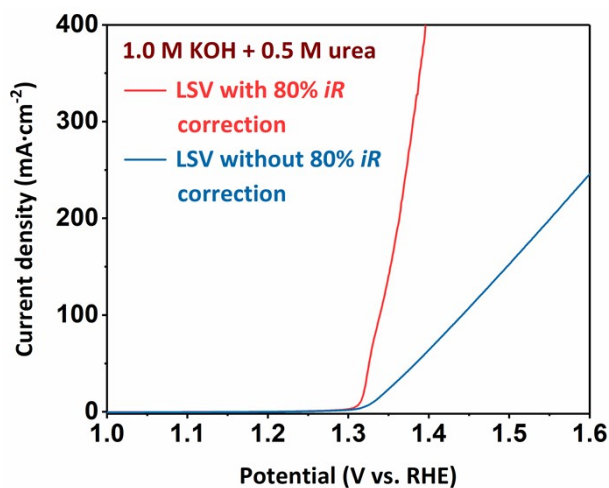

**Figure S7.** LSV curves of the  $\text{Ni}_3\text{S}_2$  catalyst in 1.0 M KOH with 0.5 M urea with/without 80%  $iR$  correction.

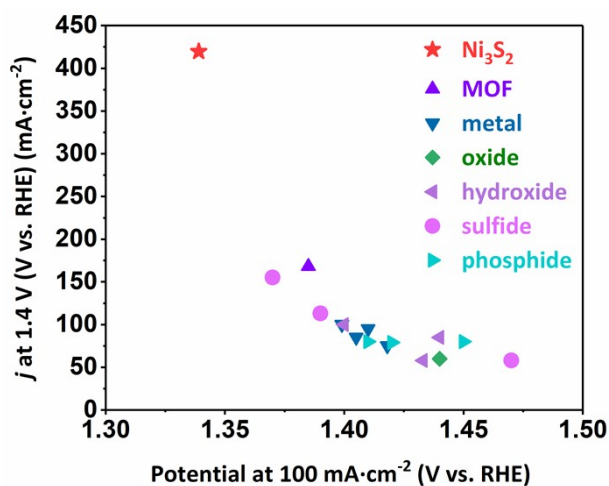

**Figure S8.** Comparison of anodic catalytic activities with different traditional UOR catalysts. The details can be found in **Table S1**.



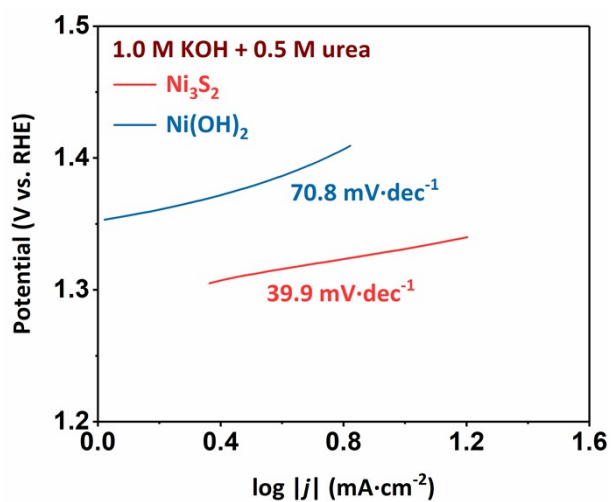

**Figure S9.** Tafel plots of  $\text{Ni}(\text{OH})_2$  and  $\text{Ni}_3\text{S}_2$  in 1.0 M KOH with 0.5 M urea.

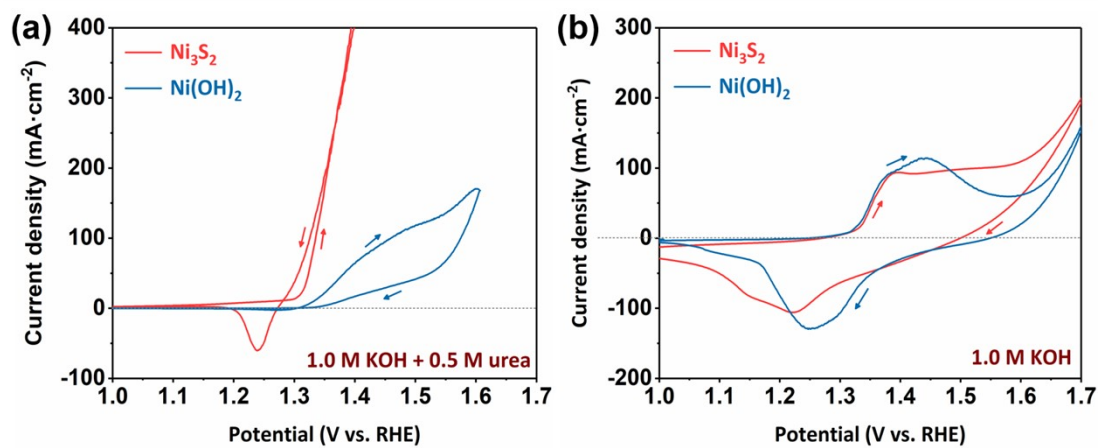

**Figure S10.** CV curves of  $\text{Ni}(\text{OH})_2$  and  $\text{Ni}_3\text{S}_2$  in 1.0 M KOH with 0.5 M urea and 1.0 M KOH.

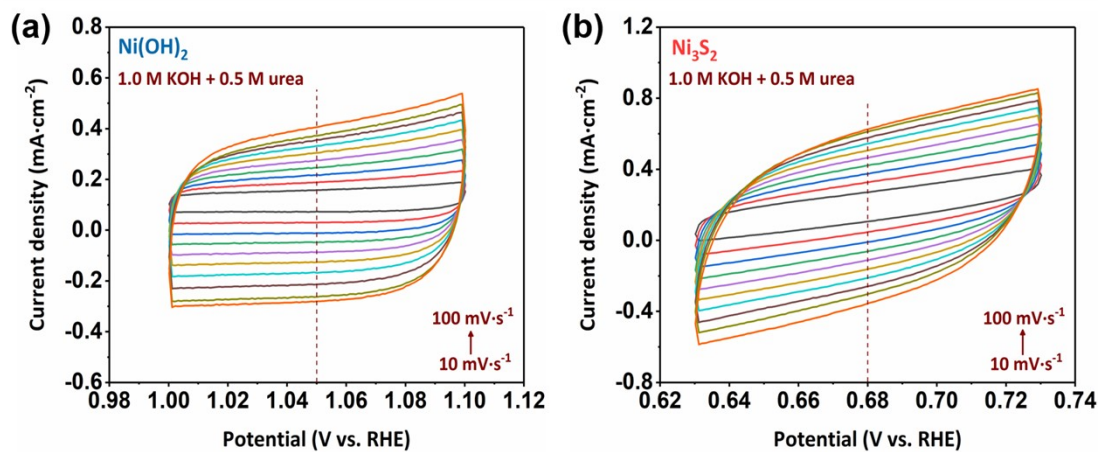

**Figure S11.** CV curves of  $\text{Ni(OH)}_2$  and  $\text{Ni}_3\text{S}_2$  in the non-faradaic capacitance current region under different scan rates in 1.0 M KOH with 0.5 M urea.

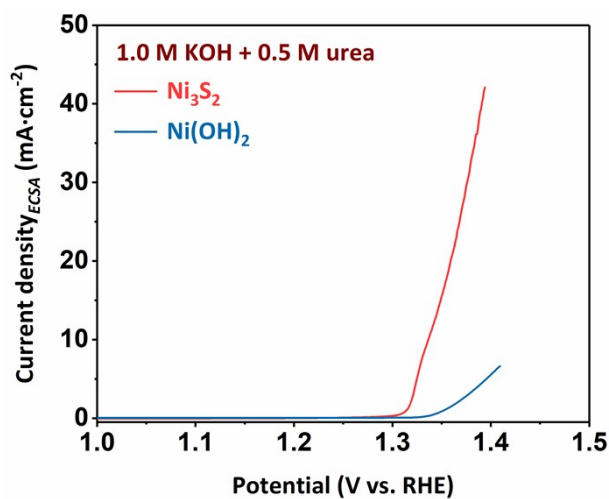

**Figure S12.** LSV curves of  $\text{Ni(OH)}_2$  and  $\text{Ni}_3\text{S}_2$  normalized by ECSA.

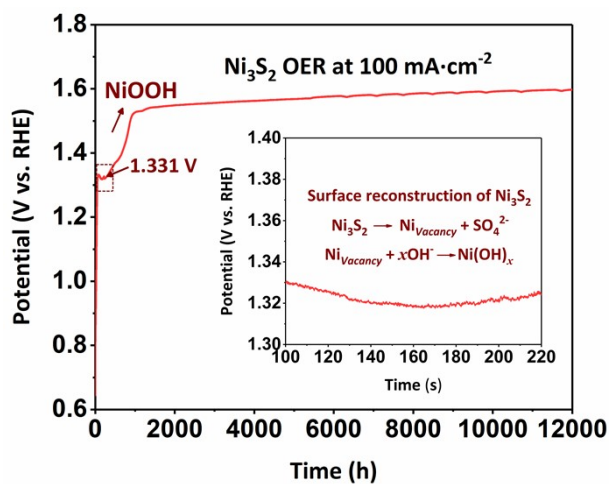

**Figure S13.** Chronoamperometry test of the Ni<sub>3</sub>S<sub>2</sub> catalyst in 1.0 M KOH under current density of 100 mA·cm<sup>-2</sup>.

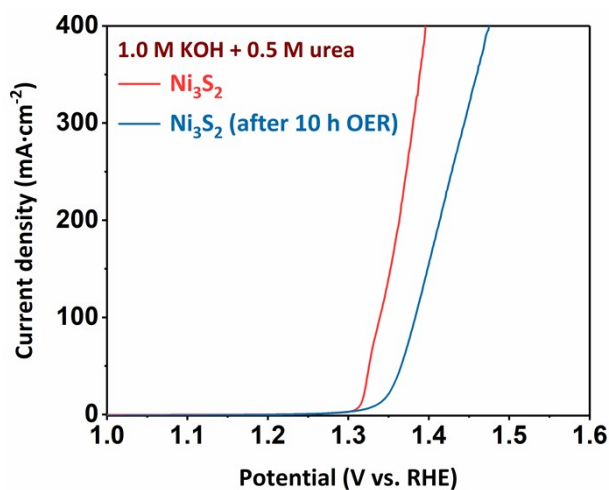

**Figure S14.** LSV curves of the Ni<sub>3</sub>S<sub>2</sub> catalyst before and after OER in 1.0 M KOH with 0.5 M urea.

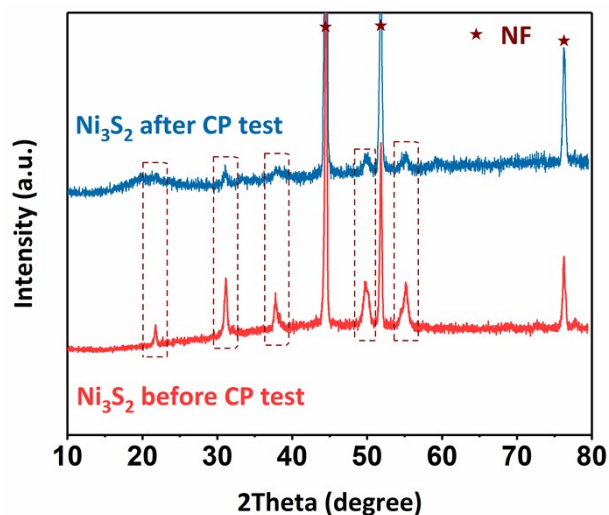

**Figure S15.** XRD patterns of the  $\text{Ni}_3\text{S}_2$  catalyst before and after 120 h chronoamperometry test.

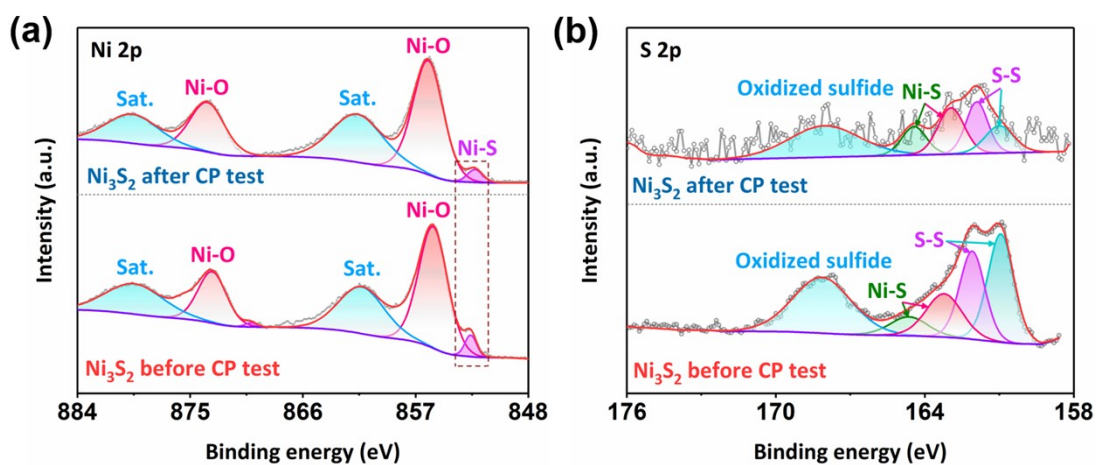

**Figure S16.** High-resolution (a) Ni 2p and (b) S 2p spectrum of the  $\text{Ni}_3\text{S}_2$  catalyst before and after 120 h chronoamperometry test.

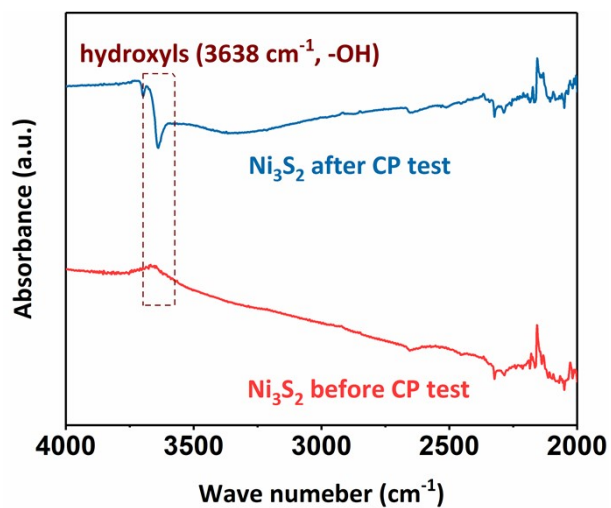

**Figure S17.** FTIR spectra of the Ni<sub>3</sub>S<sub>2</sub> catalyst before and after 120 h chronoamperometry test.

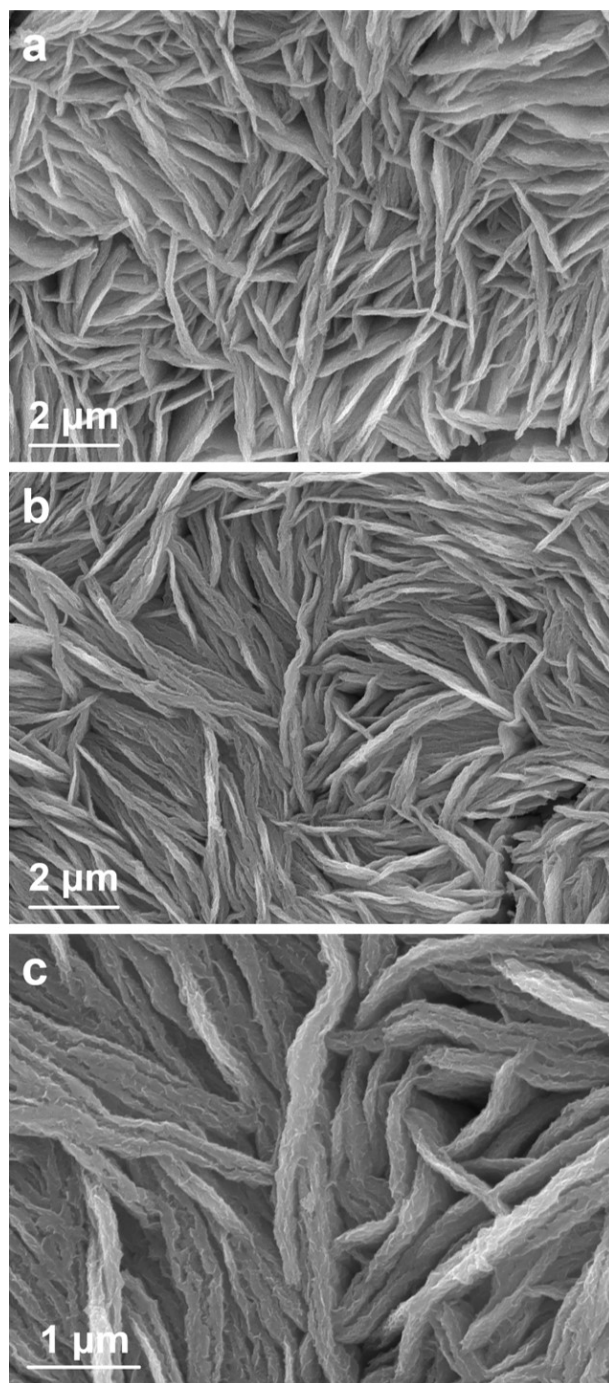

**Figure S18.** SEM images of the  $\text{Ni}_3\text{S}_2$  catalyst after 120 h chronoamperometry test.

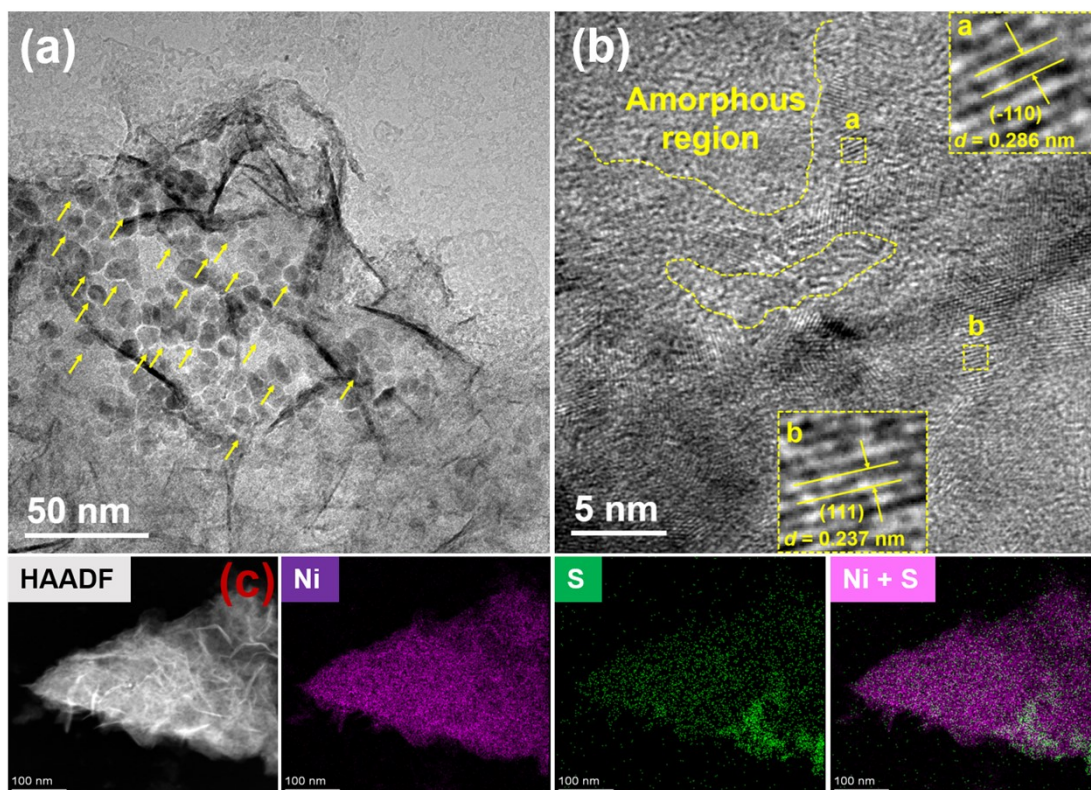

**Figure S19.** TEM images and corresponding elemental mapping images of the  $\text{Ni}_3\text{S}_2$  catalyst after 120 h chronoamperometry test.

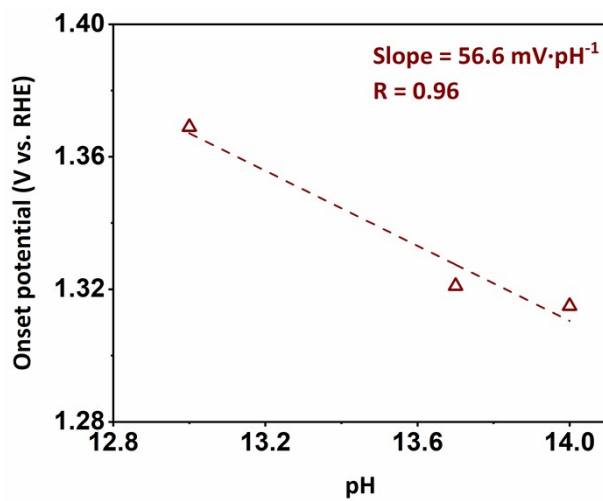

**Figure S20.** Effect of pH on the onset potential for the  $\text{Ni}_3\text{S}_2$  catalyst.

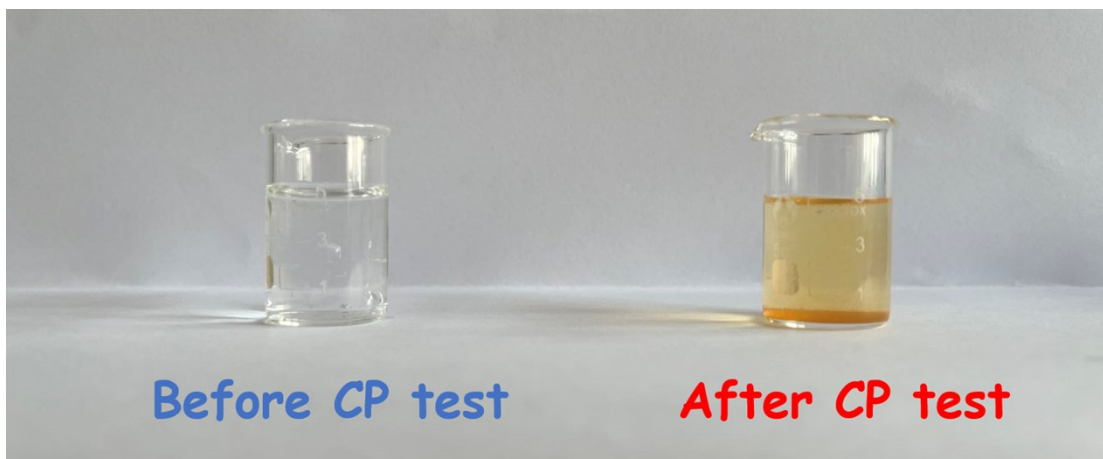

**Figure S21.** Digital image of the electrolyte after adding the Nessler reagent. Left: the initial electrolyte. Right: the electrolyte after 40 h chronoamperometry test.

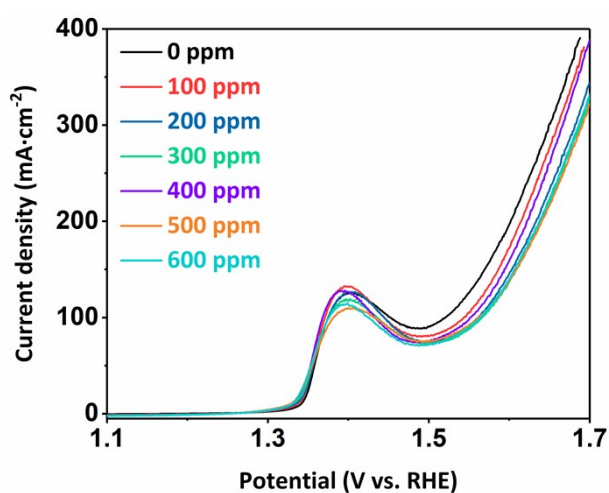

**Figure S22.** LSV curves of the Ni<sub>3</sub>S<sub>2</sub> catalyst in 1.0 M KOH with 100, 200, 300, 400, 500, and 600 ppm of ammonia.



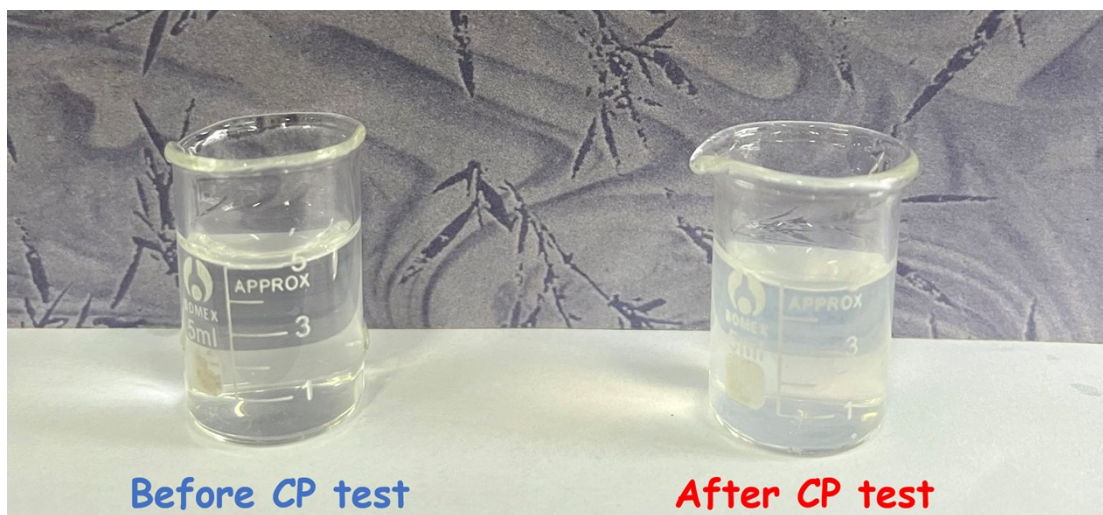

**Figure S23.** Digital image of the saturated lime water before and after passing into the gas during the anodic reaction. Left: the initial electrolyte. Right: the electrolyte after 40 h chronoamperometry test.

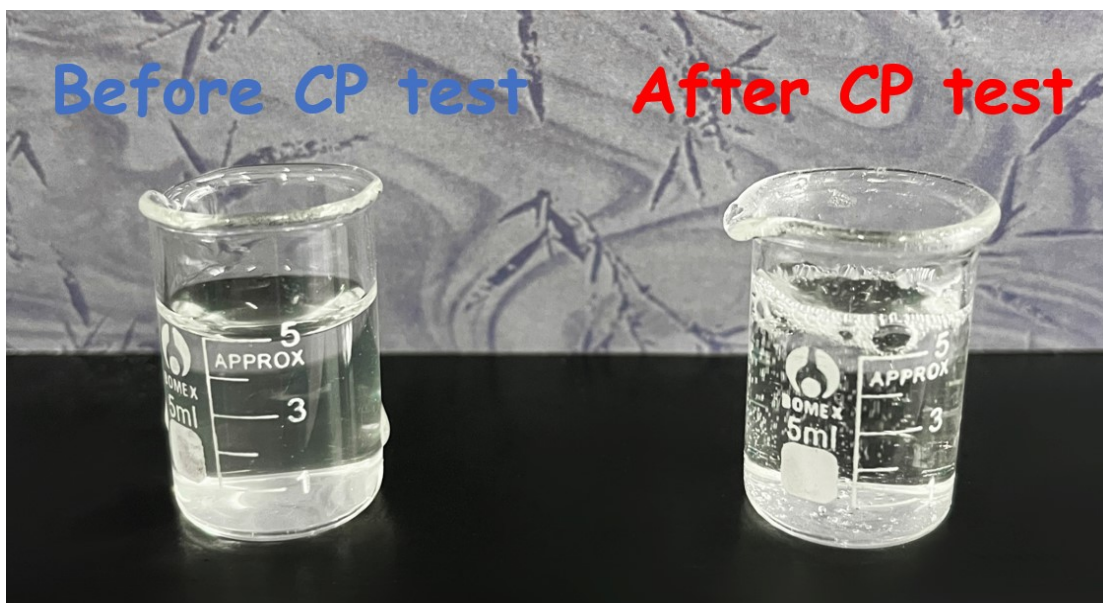

**Figure S24.** Digital image of the hydrochloric-acidified electrolyte. Left: the initial electrolyte. Right: the electrolyte after 40 h chronoamperometry test.

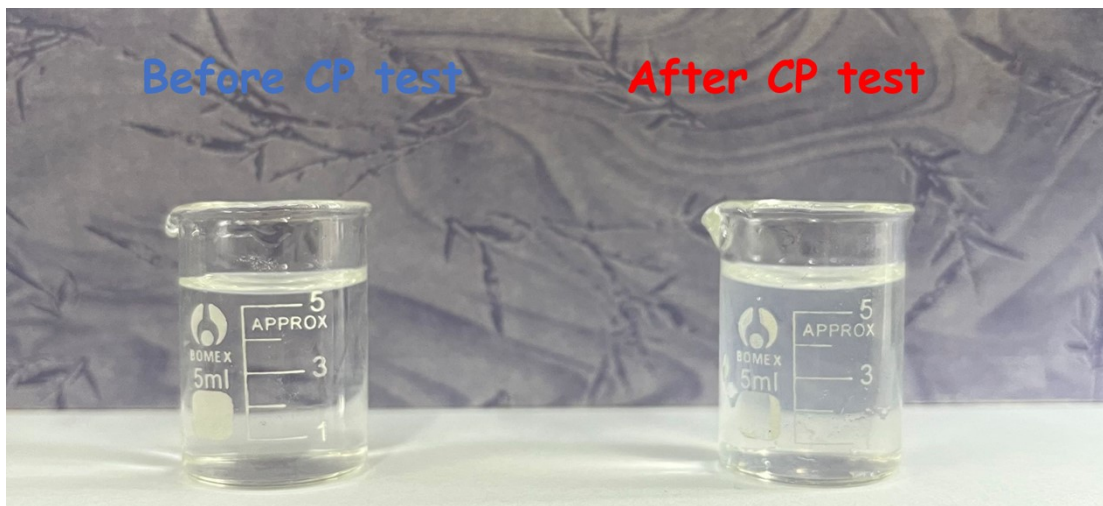

**Figure S25.** Digital image of the hydrochloric-acidified electrolyte after adding  $\text{BaCl}_2$ .

Left: the initial electrolyte. Right: the electrolyte after 40 h chronoamperometry test.

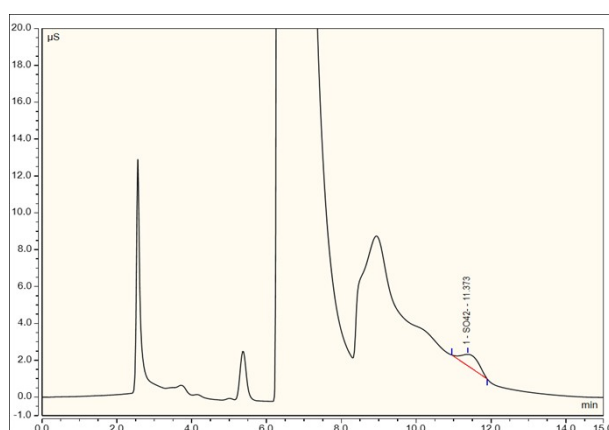

**Figure S26.** Ion chromatography (IC) test to calculate the concentration of  $\text{SO}_4^{2-}$  ions

in the electrolyte after 40 h chronoamperometry test.

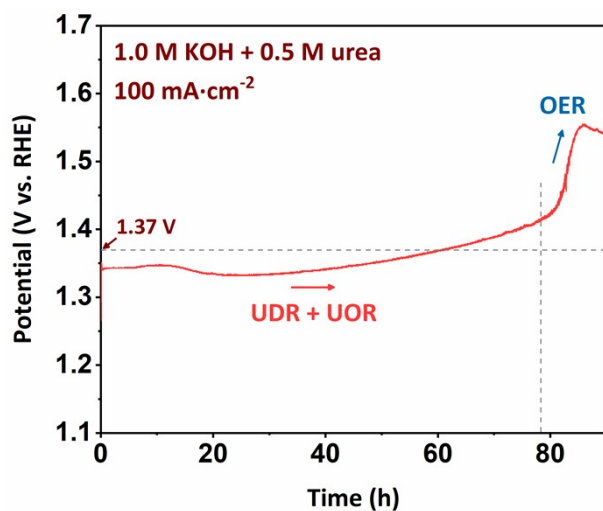

**Figure S27.** Chronoamperometry test of the Ni<sub>3</sub>S<sub>2</sub> catalyst until urea is completely consumed in 1.0 M KOH with 0.5 M under current density of 100 mA·cm<sup>-2</sup>.

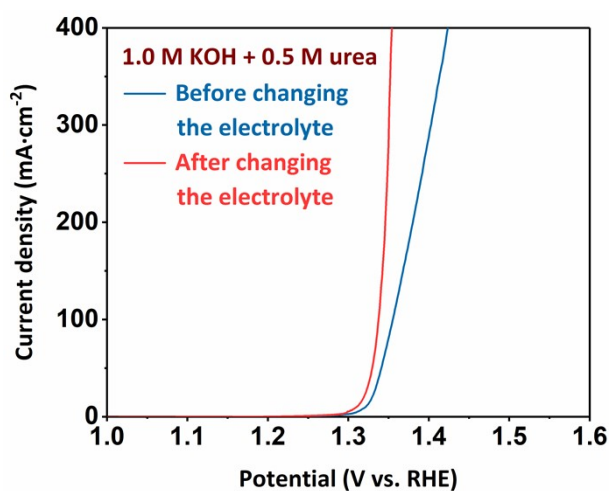

**Figure S28.** LSV curves of the Ni<sub>3</sub>S<sub>2</sub> catalyst before and after changing the electrolyte.

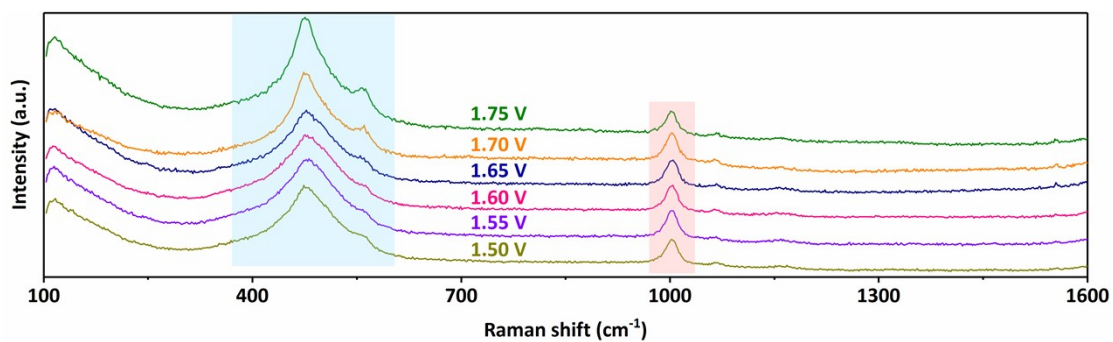

**Figure S29.** In situ Raman spectra of the  $\text{Ni}_3\text{S}_2$  catalyst in 1.0 M KOH with 0.5 M urea at high applied potential region.

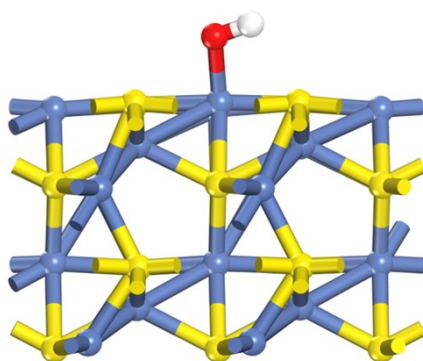

**Figure S30.** The model of  $^*\text{OH}$  adsorbed on the (002) plane of  $\text{Ni}_3\text{S}_2$ .

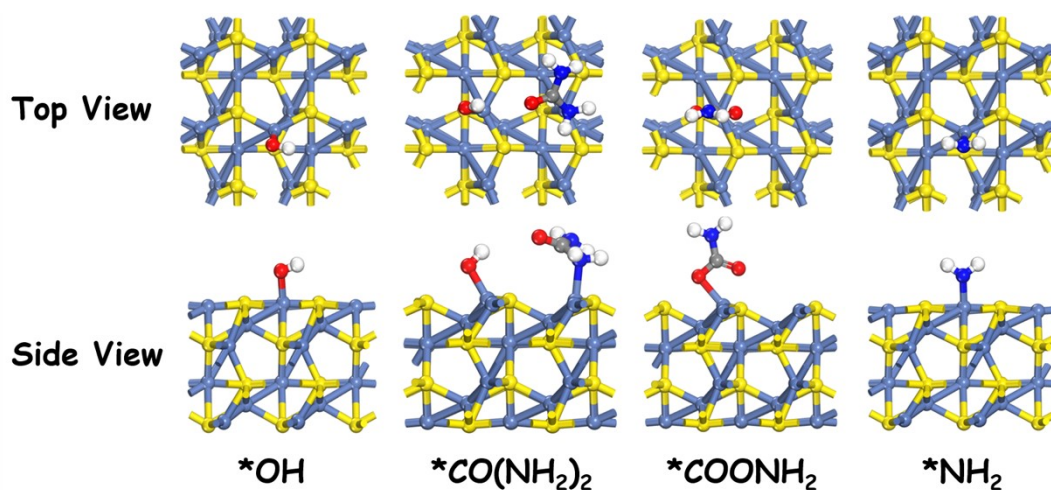

**Figure S31.** Models of  $^*\text{OH}$ ,  $^*\text{CO}(\text{NH}_2)_2$ ,  $^*\text{COONH}_2$  and  $^*\text{NH}_2$  intermediates.

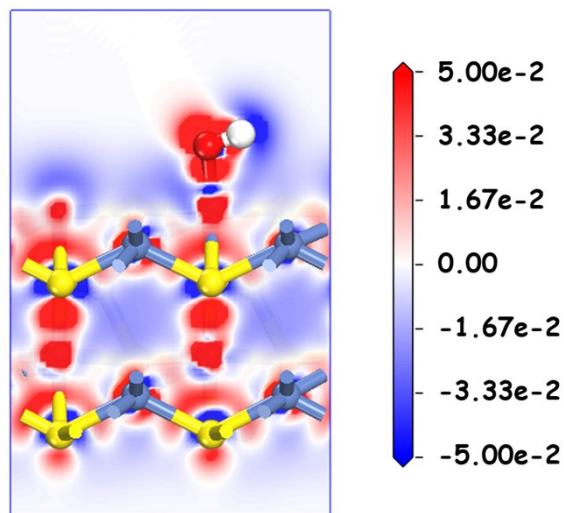

Figure S32. extracted 2D data plot of  $\text{Ni}_3\text{S}_2\text{-OH}^*$ .

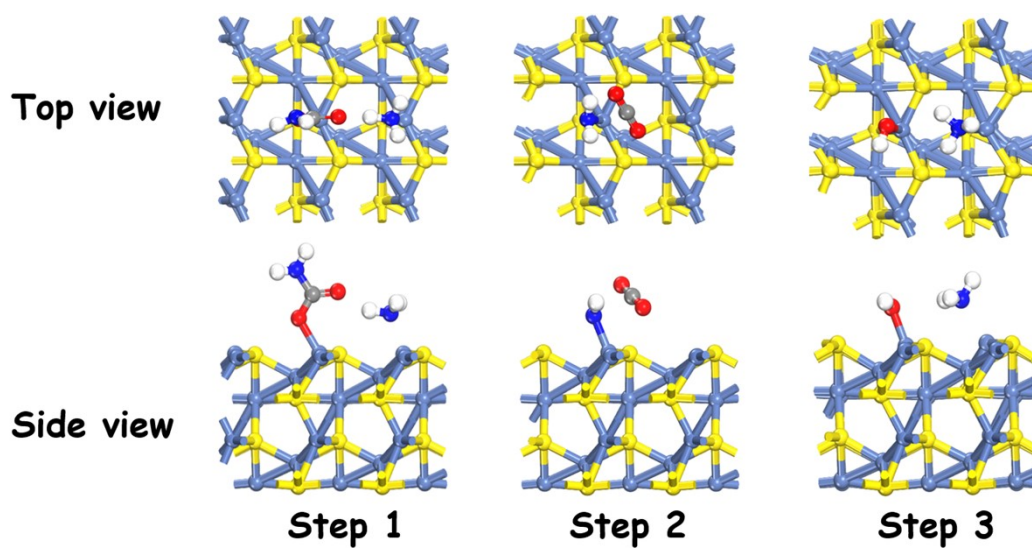

Figure S33. Models of desorption of  $\text{NH}_3$  and  $\text{CO}_2$  in each step of UDR.

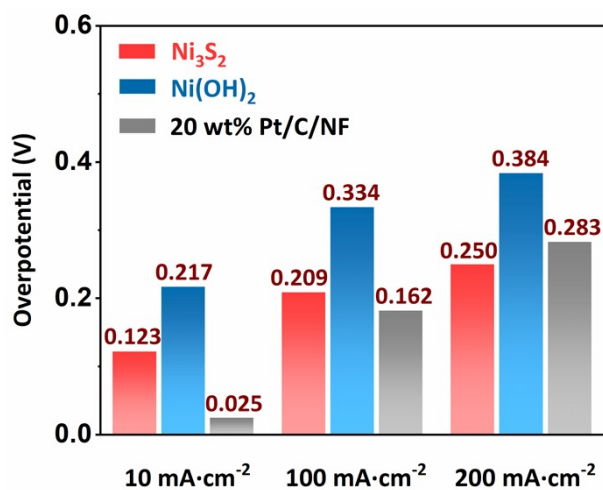

**Figure S34.** Comparisons of corresponding HER overpotentials required at 10, 100, and 200  $\text{mA}\cdot\text{cm}^{-2}$  of  $\text{Ni}_3\text{S}_2$ ,  $\text{Ni}(\text{OH})_2$  and 20 wt% Pt/C/NF in 1.0 M KOH.

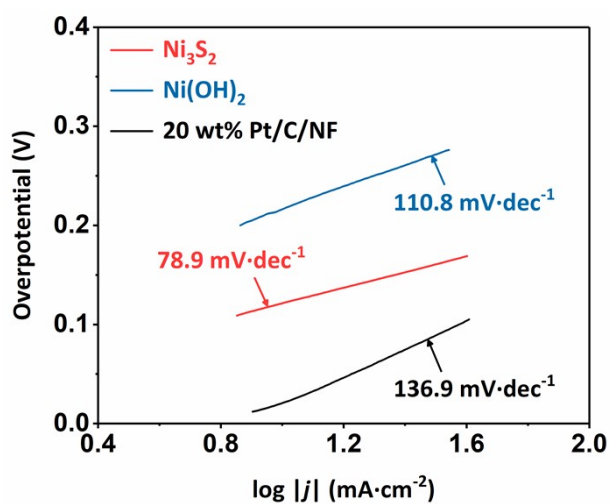

**Figure S35.** Tafel plots of  $\text{Ni}_3\text{S}_2$ ,  $\text{Ni}(\text{OH})_2$  and 20 wt% Pt/C/NF in 1.0 M KOH.

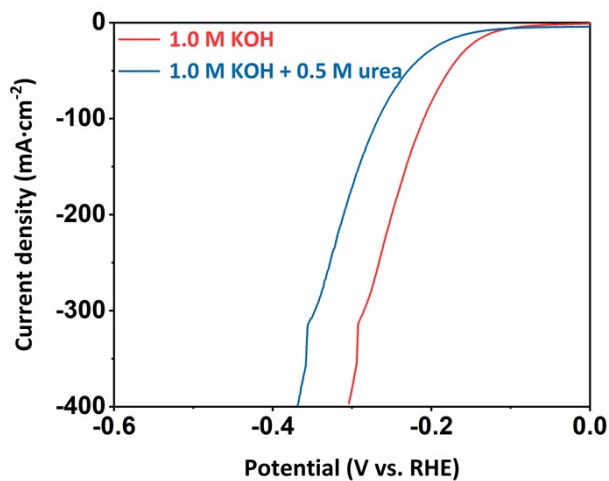

**Figure S36.** HER LSV curves of the Ni<sub>3</sub>S<sub>2</sub> catalyst in 1.0 M KOH and 1.0 M KOH with 0.5 M urea.

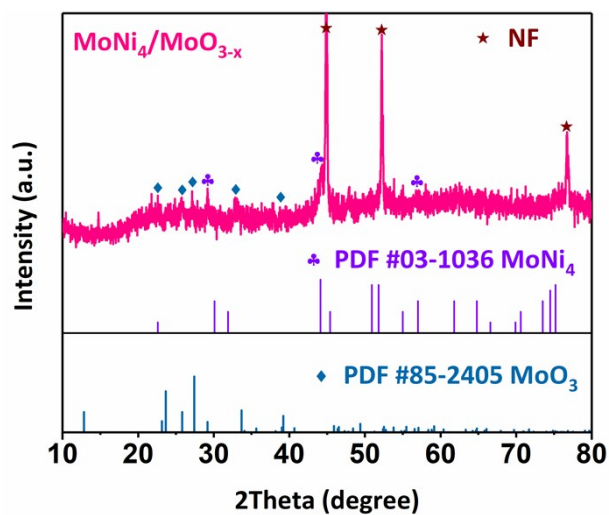

**Figure S37.** XRD pattern of the MoNi<sub>4</sub>/MoO<sub>3-x</sub> catalyst.

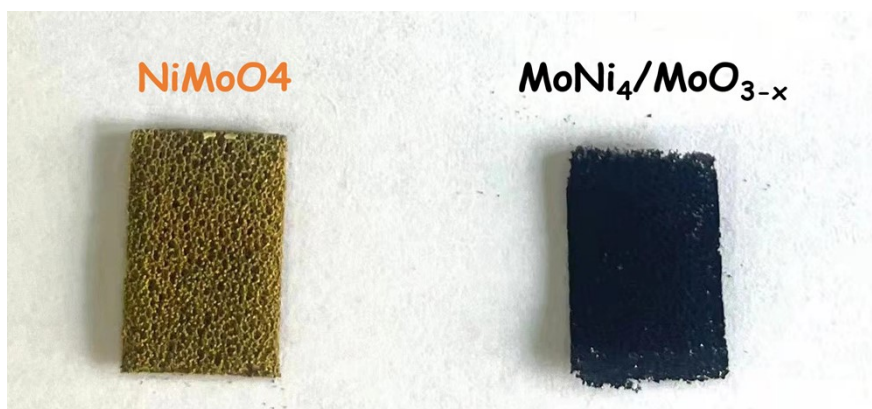

**Figure S38.** Digital images of  $\text{NiMoO}_4$  and  $\text{MoNi}_4/\text{MoO}_{3-x}$ .



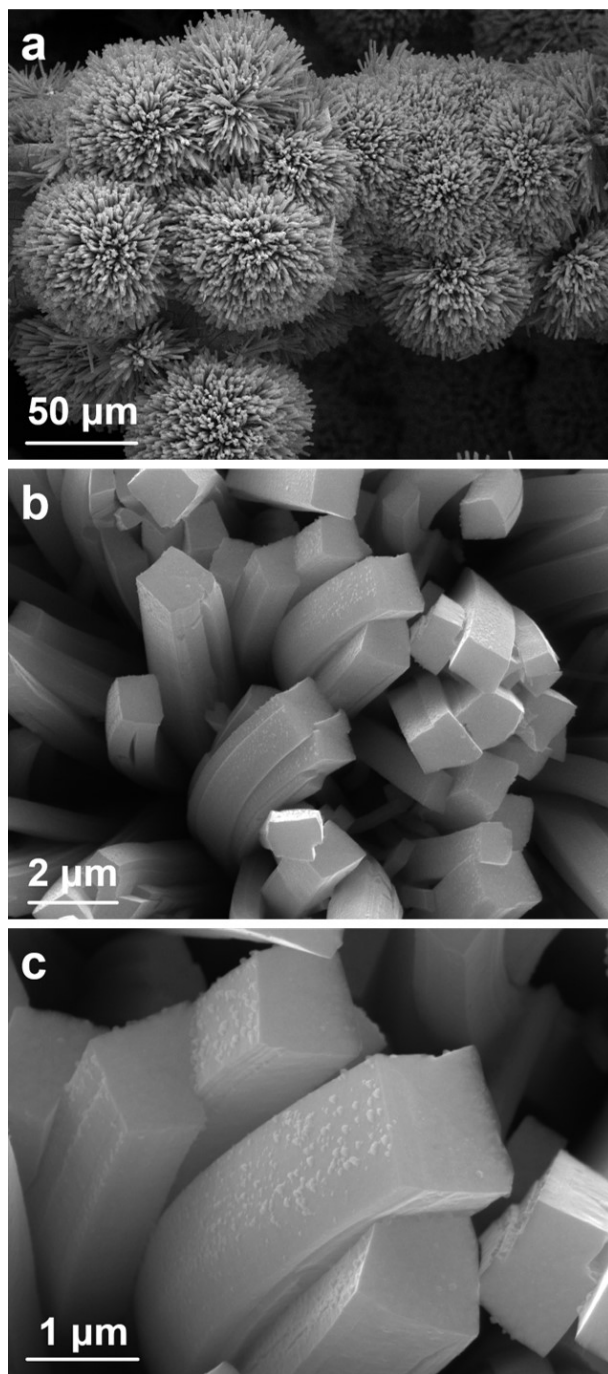

**Figure S39.** SEM images of the  $\text{MoNi}_4/\text{MoO}_{3-x}$  catalyst.

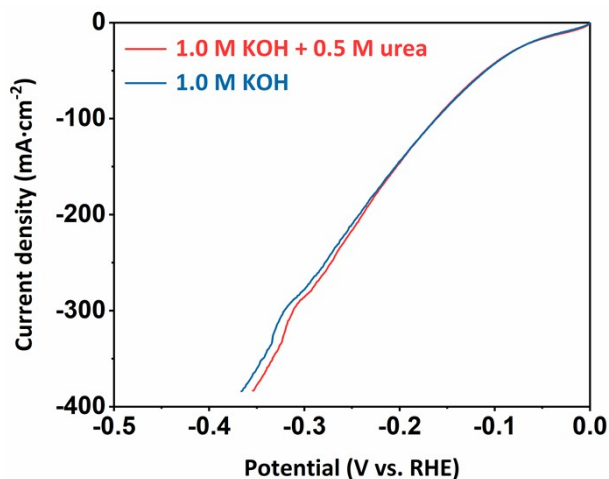

**Figure S40.** HER LSV curves of the MoNi<sub>4</sub>/MoO<sub>3-x</sub> catalyst for HER in 1.0 M KOH with 0.5 M urea and 1.0 M KOH.

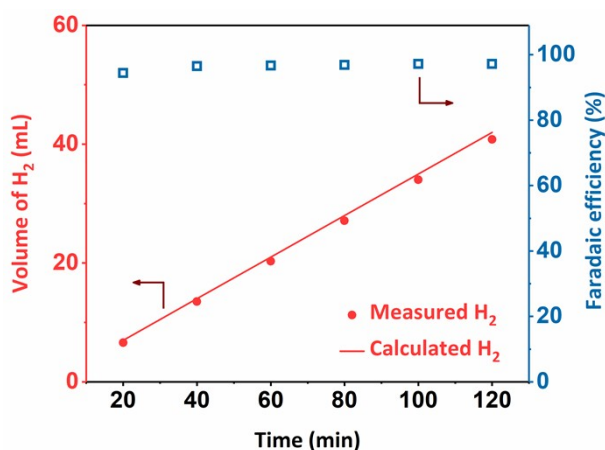

**Figure S41.** Faradaic efficiency of hydrogen production in the cell system at 50 mA·cm<sup>-2</sup>.

**Table S1.** Comparisons of the catalytic activity with recently reported highly efficient traditional UOR catalysts.

| Catalyst | Electrolyte | Potential@100<br>mA·cm <sup>-2</sup><br>(V vs. RHE ) | Current<br>density<br>(mA·cm <sup>-2</sup><br>@1.4 V ) | Catalyst<br>substrate | Ref. |
|----------|-------------|------------------------------------------------------|--------------------------------------------------------|-----------------------|------|
|----------|-------------|------------------------------------------------------|--------------------------------------------------------|-----------------------|------|

|                                                                         |                           |       |       |                               |              |
|-------------------------------------------------------------------------|---------------------------|-------|-------|-------------------------------|--------------|
| Ni <sub>3</sub> S <sub>2</sub>                                          | 1 M KOH +<br>0.5 M Urea   | 1.339 | 419.6 | NF                            | This<br>work |
| FeNi-MOF NSs                                                            | 1 M KOH +<br>0.33 M Urea  | 1.385 | 168   | Ti mesh                       | [3]          |
| Ni <sub>2</sub> P@Ni-<br>MOF/NF                                         | 1 M NaOH +<br>0.33 M Urea | 1.41  | 80    | NF                            | [4]          |
| N-<br>Ni <sub>1</sub> Co <sub>3</sub> Mn <sub>0.4</sub> O/<br>NF        | 1 M KOH<br>+0.5 M Urea    | 1.399 | 100   | NF                            | [5]          |
| NiMoV<br>LDH/NF                                                         | 1 M KOH +<br>0.33 M Urea  | 1.4   | 100   | NF                            | [6]          |
| NiClO-D                                                                 | 1 M KOH +<br>0.33 M Urea  | 1.44  | 60    | Glassy<br>carbon<br>electrode | [7]          |
| Ni(OH) <sub>2</sub> @NF                                                 | 1 M KOH +<br>0.3 M Urea   | 1.44  | 85    | NF                            | [8]          |
| N-NiS/NiS <sub>2</sub>                                                  | 1 M KOH +<br>0.33 M Urea  | 1.47  | 58    | Carbon<br>cloth               | [9]          |
| NiMoO <sub>4</sub> -<br>Ni(OH) <sub>2</sub> /NF                         | 1 M KOH +<br>0.5 M Urea   | 1.418 | 75    | NF                            | [10]         |
| r-NiMoO <sub>4</sub> /NF                                                | 1 M KOH<br>+0.5 M Urea    | 1.41  | 95    | NF                            | [11]         |
| CuO NWs/CF                                                              | 1 M KOH +<br>0.5 M Urea   | 1.405 | 85    | Cu foam                       | [12]         |
| CuO Nanobelt                                                            | 1 M KOH +<br>0.5 M Urea   | 1.43  | 30    | Cu foam                       | [13]         |
| Ni <sub>3</sub> S <sub>2</sub> -NiS/NF                                  | 1 M KOH +<br>0.5 M Urea   | 1.37  | 155   | NF                            | [14]         |
| CA-Ni <sub>5</sub> P <sub>4</sub> @<br>NiO <sub>x</sub> /NF             | 1 M NaOH +<br>0.33 M Urea | 1.45  | 80    | NF                            | [15]         |
| Ni <sub>2</sub> P/ZnP <sub>4</sub> /<br>NF-300                          | 1 M KOH +<br>0.5 M Urea   | 1.42  | 79    | NF                            | [16]         |
| Fe-NiCo <sub>2</sub> S <sub>4</sub> /<br>Ni <sub>3</sub> S <sub>2</sub> | 1 M KOH +<br>0.5 M Urea   | 1.39  | 113   | NF                            | [17]         |

|                                       |                         |       |     |                 |      |
|---------------------------------------|-------------------------|-------|-----|-----------------|------|
| CoO-Co <sub>4</sub> N@<br>NiFe-LDH/NF | 1M KOH+<br>0.33 M Urea  | 1.433 | 58  | NF              | [18] |
| CoFe<br>LDH/MOF-<br>0.06/CC           | 1 M KOH+<br>0.33 M Urea | 1.57  | <20 | Carbon<br>cloth | [19] |

**Table S2.** Comparisons of the alkaline urea water splitting performance with recently reported cell systems.

| Cell system                                                             | Voltage at $\eta_{10}$ (V) | Ref       |
|-------------------------------------------------------------------------|----------------------------|-----------|
| Ni <sub>3</sub> S <sub>2</sub>    MoNi <sub>4</sub> /MoO <sub>3-x</sub> | 1.341                      | This work |
| H-NiFe-LDH/NF                                                           | 1.418                      | [20]      |
| CA-Ni <sub>5</sub> P <sub>4</sub> @NiO <sub>x</sub> /NF                 | 1.53                       | [15]      |
| Ni <sub>3</sub> N/Ni <sub>0.2</sub> Mo <sub>0.8</sub> N/NF              | 1.348                      | [21]      |
| Ni <sub>3</sub> S <sub>2</sub> -Ni <sub>3</sub> P/NF                    | 1.43                       | [22]      |
| NCS/NF                                                                  | 1.397                      | [23]      |
| Cu <sub>2</sub> S@Ni <sub>3</sub> Se <sub>2</sub>                       | 1.48                       | [24]      |
| Ni-Mn-Se/NF                                                             | 1.352                      | [25]      |
| F-Ni(OH) <sub>2</sub>                                                   | 1.37                       | [26]      |
| NiCo <sub>2</sub> S <sub>4</sub> /CC                                    | 1.45                       | [27]      |
| NiMoS/NF                                                                | 1.377                      | [28]      |
| Fe <sub>11%</sub> -NiO/NF                                               | 1.579                      | [29]      |
| NiCo MOF/NF-EA                                                          | 1.477                      | [30]      |
| FeNi <sub>3</sub> -MoO <sub>2</sub>                                     | 1.37                       | [31]      |
| Ni <sub>2</sub> P/Fe <sub>2</sub> P/NF                                  | 1.47                       | [32]      |
| NiMoO <sub>4</sub>                                                      | 1.38                       | [33]      |
| P-NiFe@CF                                                               | 1.37                       | [34]      |

|                                                |       |      |
|------------------------------------------------|-------|------|
| NC-FNCP                                        | 1.52  | [35] |
| $\beta$ -NiMoO <sub>4</sub>                    | 1.633 | [36] |
| Ni(OH) <sub>2</sub> /NiO-C/WO <sub>3</sub> HAs | 1.37  | [37] |
| NiS                                            | 1.445 | [38] |
| Ni <sub>3</sub> S <sub>2</sub> /Ni/NF          | 1.36  | [39] |

## References

- 1 J. Perdew, K. Burke, M. Ernzerhof, *Phys. Rev. Lett.*, 1996, **77**, 3865-3868.
- 2 H. Monkhorst, J. Pack, *Phys. Rev. B*, 1976, **13**, 5188-5192.
- 3 X. Zhang, X. Fang, K. Zhu, W. Yuan, T. Jiang, H. Xue, J. Tian, *J. Power Sources*, 2022, **520**, 230882.
- 4 H. Wang, H. Zou, Y. Liu, Z. Liu, W. Sun, K. Lin, T. Li, S. Luo, *Sci. Rep.*, 2021, **11**, 21414.
- 5 T. Wang, Y. Cao, H. Wu, C. Feng, Y. Ding, H. Mei, *Int. J. Hydro. Energy*, 2022, **47**, 5766-5778.
- 6 Z. Wang, W. Liu, J. Bao, Y. Song, X. She, Y. Hua, G. Lv, J. Yuan, H. Li, H. Xu, *Chem. Eng. J.*, 2022, **430**, 133100.
- 7 L. Zhang, L. Wang, H. Lin, Y. Liu, J. Ye, Y. Wen, A. Chen, L. Wang, F. Ni, Z. Zhou, S. Sun, Y. Li, B. Zhang, H. Peng, *Angew. Chem. Int. Ed.*, 2019, **58**, 16820-16825.
- 8 L. Xia, Y. Liao, Y. Qing, H. Xu, Z. Gao, W. Li, Y. Wu, *ACS Appl. Energy Mater.*, 2020, **3**, 2996-3004.
- 9 H. Liu, Z. Liu, F. Wang, L. Feng, *Chem. Eng. J.*, 2020, **397**, 125507.
- 10 S. Hu, H. Wu, C. Feng, Y. Ding, *Int. J. Hydro. Energy*, 2020, **45**, 21040-21050.
- 11 Y. Tong, P. Chen, M. Zhang, T. Zhou, L. Zhang, W. Chu, C. Wu, Y. Xie, *ACS Catal.*, 2018, **8**, 1-7.
- 12 H. Sun, J. Liu, G. Chen, H. Kim, S. Kim, Z. Hu, J. Chen, S. Haw, F. Ciucci, W. Jung, *Small Methods*, 2022, **6**, 2101017.
- 13 Y. Wang, Y. Li, L. Ding, J. Ding, *Chem. Commun.*, 2019, **55**, 13562-13565.

- 14 Q. Zhao, C. Meng, D. Kong, Y. Wang, H. Hu, X. Chen, Y. Han, X. Chen, Y. Zhou, M. Lin, M. Wu, *ACS Sustain. Chem. Eng.*, 2021, **9**, 15582-15590.
- 15 Z. Ma, H. Wang, H. Ma, S. Zhan, Q. Zhou, *Fuel*, 2022, 315, 123279.
- 16 R. Wang, T. Wnag, C. Feng, H. Wu, Y. Ding, H. Me, *Int. J. Hydro. Energy*, 2021, 46, 38247-38257.
- 17 Y. Wang, N. Chen, X. Du, X. Han, X. Zhang, *J. Alloys Compd.*, 2022, 893, 162269.
- 18 B. Chen, M. Humayun, Y. Li, H. Zhang, H. Sun, Y. Wu, C. Wang, *ACS Sustain. Chem. Eng.*, 2021, **9**, 14180-14192.
- 19 S. Huang, Y. Wu, J. Fu, P. Xin, Q. Zhang, Z. Jin, J. Zhang, Z. Hu, Z. Chen, *Nanotechnology*, 2021, **32**, 385405.
- 20 L. Chen, H. Wang, L. Tan, D. Qiao, X. Liu, Y. Wen, W. Hou, T. Zhan, *J. Colloid Inter. Sci.*, 2022, **618**, 141-148.
- 21 R. Li, X. Wan, B. Chen, R. Cao, Q. Ji, J. Deng, K. Qu, X. Wang, Y. Zhu, *Chem. Eng. J.*, 2021, **409**, 128240.
- 22 J. Liu, Y. Wang, Y. Liao, C. Wu, Y. Yan, H. Xie, Y. Chen, *ACS Appl. Mater. Inter.*, 2021, **13**, 26948-26959.
- 23 W. Liu, L. Dai, Y. Hu, K. Jiang, Q. Li, Y. Deng, J. Yuan, J. Bao, Y. Lei, *Inorg. Chem. Front.*, 2021, **8**, 4528-4535.
- 24 L. Lv, Z. Li, H. Wan, C. Wang, *J. Colloid Inter. Sci.*, 2021, **592**, 13-21.
- 25 M. Maleki, G. Darband, A. Rouhaghdam, R. Andaveh, Z. Kazemi, *Chem. Commun.*, 2022, **58**, 3545-3548.
- 26 S. Patil, N. Chodankar, S. Hwang, G. Raju, Y. Huh, Y. Han, *Small*, 2022, **18**, 2103326.
- 27 W. Song, M. Xu, X. Teng, Y. Niu, S. Gong, X. Liu, X. He, Z. Chen, *Nanoscale*, 2021, **13**, 1680-1688.
- 28 F. Wang, K. Zhang, Q. Zha, Y. Ni, *J. Alloys Compd.*, 2022, **899**, 163346.
- 29 Z. Wu, Z. Zou, J. Huang, F. Gao, *J. Catal.*, 2018, **358**, 243-252.
- 30 D. Wei, W. Tang, N. Ma, Y. Wang, *J. Alloys Compd.*, 2021, **874**, 159945.
- 31 Q. Xu, T. Yu, J. Chen, G. Qian, H. Song, L. Luo, Y. Chen, T. Liu, Y. Wang, S. Yin, *ACS*

- Appl. Mater. Inter.* 2021, **13**, 16355-16363.
- 32 L. Yan, Y. Sun, E. Hu, J. Ning, Y. Zhong, Z. Zhang, Y. Hu, *J. Colloid Inter. Sci.*, 2019, **541**, 279-286.
- 33 Z. Yu, C. Lang, M. Gao, Y. Chen, Q. Fu, Y. Duan, S. Yu, *Energy Environ. Sci.*, 2018, **11**, 1890-1897.
- 34 W. Yun, G. Das, B. Kim, B. Park, H. Yoon, Y. Yoon, *Sci. Rep.*, 2021, **11**, 22003.
- 35 J. Zhang, S. Huang, P. Ning, P. Xin, Z. Chen, Q. Wang, K. Uvdal, Z. Hu, *Nano Res.*, 2022, **15**, 1916-1925.
- 36 K. Hu, S. Jeong, G. Elumalai, S. Kukunuri, J. Fujita, Y. Ito, *ACS Appl. Energy Mater.*, 2020, **3**, 7535-7542.
- 37 J. Zhao, Y. Zhang, H. Guo, J. Ren, H. Zhang, Y. Wu, R. Song, *Chem. Eng. J.*, 2022, **433**, 134497.
- 38 M. Zhong, W. Li, C. Wang, X. Lu, *Appl. Surf. Sci.*, 2022, **575**, 151708.
- 39 X. Zhuo, W. Jiang, G. Qian, J. Chen, T. Yu, L. Luo, L. Lu, Y. Chen, S. Yin, *ACS Appl. Mater. Inter.* 2021, **13**, 35709-35718.
